# Supplementary material for: Photocatalytic reduction of CO2 with H2O: significant enhancement of the activity of Pt–TiO2 in CH4 formation by addition of MgO
Source: Royal Society of Chemistry journal article supplement (doi:10.1039/c3cc00107e), 2013-01-01
Supplement: c3cc00107e.pdf [file c3cc00107e.pdf]

# Photocatalytic reduction of CO<sub>2</sub> with H<sub>2</sub>O: Significant enhancement of the activity of Pt/TiO<sub>2</sub> for CH<sub>4</sub> formation by addition of MgO

Shunji Xie, Yu Wang, Qinghong Zhang,\* Wenqing Fan, Weiping Deng and Ye Wang\*

*State Key Laboratory of Physical Chemistry of Solid Surfaces, Innovation Center of Chemistry for Energy Materials, National Engineering Laboratory for Green Chemical Productions of Alcohols, Ethers and Esters, College of Chemistry and Chemical Engineering, Xiamen University, Xiamen 361005, China*

## Electronic Supplementary Information

### 1. Experimental details

#### (1) Preparation of photocatalysts

TiO<sub>2</sub> (P25), which contained 20% rutile and 80% anatase, was purchased from Degussa. The Pt/TiO<sub>2</sub> was prepared by a photodeposition method. Briefly, a certain amount of TiO<sub>2</sub> was suspended in an aqueous solution of hexachloroplatinic acid (H<sub>2</sub>PtCl<sub>6</sub>) containing 0.1 M methanol as a hole scavenger. The suspension was irradiated with a 300 W mercury lamp for 2 h. The obtained sample was recovered by filtration, followed by washing repeatedly with deionized water and drying at 373 K for 12 h. Basic metal oxide-modified TiO<sub>2</sub> samples including MgO/TiO<sub>2</sub> were prepared by an impregnation method in aqueous solutions using TiO<sub>2</sub> (P25) and metal nitrate as precursors. After impregnation and drying, the sample was calcined at 773 K for 4 h in air. The Pt–MgO/TiO<sub>2</sub> or other metal oxide-modified Pt/TiO<sub>2</sub> catalyst was prepared by the photodeposition of Pt nanoparticles onto MgO/TiO<sub>2</sub> or other metal oxide-modified TiO<sub>2</sub> using the same procedure as that for Pt/TiO<sub>2</sub>.

#### (2) Characterization of photocatalysts

The photocatalysts were characterized by Powder X-ray diffraction (XRD), N<sub>2</sub> physisorption, transmission electron microscopy (TEM) and CO<sub>2</sub> chemisorption measurements.

XRD patterns were collected on a Panalytical X'pert Pro diffractometer using Cu K<sub>α</sub> radiation (40 kV, 30 mA). Only diffraction peaks ascribed to TiO<sub>2</sub> crystallites containing both rutile and anatase phases were observed. No peaks belonging to basic metal oxides (e.g., MgO) or Pt were detected.

N<sub>2</sub> physisorption was carried out with a Micromeritics Tristar 3020 surface area and porosimetry analyzer to measure the surface area of the photocatalyst.

TEM measurements were performed on a JEM-2100 electron microscope operated at an

acceleration voltage of 200 kV.

The amount of CO<sub>2</sub> chemisorption was measured at room temperature with a ASAP2020C Micromeritics apparatus by adopting the procedure reported by Teramura et al.<sup>1</sup>

### (3) Photocatalytic reaction

Photocatalytic reduction of CO<sub>2</sub> in the presence of H<sub>2</sub>O was carried out in a stainless-steel reactor (volume, ~100 mL) with a quartz window on the top of the reactor (Fig. S1). The photocatalyst was placed on a Teflon catalyst holder. The light source was 100 W Xe lamp (Beijing Trusttech Co., Ltd.) at UV-vis ( $\lambda = 320\text{-}780$  nm). Typically, 20 mg of catalyst was used. The pressure of CO<sub>2</sub> was typically regulated at 2.0 MPa, and 1.0 mL of water was added in the reactor. The photocatalytic reaction was typically performed at room temperature for 10 h.

The amounts of CO and CH<sub>4</sub> after the reaction were analyzed by gas chromatography. In our work, we adopted an FID detector for quantifying the amounts of products formed from CO<sub>2</sub> to ensure high sensitivities. After the effluents containing CO<sub>2</sub>, CO and CH<sub>4</sub> were separated by a carbon molecular sieve (TDX-01) column, CO and CO<sub>2</sub> were further converted to CH<sub>4</sub> by a methanation reactor, and were then analyzed by the FID detector. H<sub>2</sub> was used as the carrier gas. The detection limits of our analytic method for CH<sub>4</sub> and CO were both 2 nmol (0.002  $\mu\text{mol}$ ). We performed the same experiment for 3 times for each catalyst, and the relative error was <5%.

Liquid products such as CH<sub>3</sub>OH, HCHO and HCOOH possibly formed and dissolved in water were also analyzed by gas chromatography, but no such products were detected under our reaction conditions.

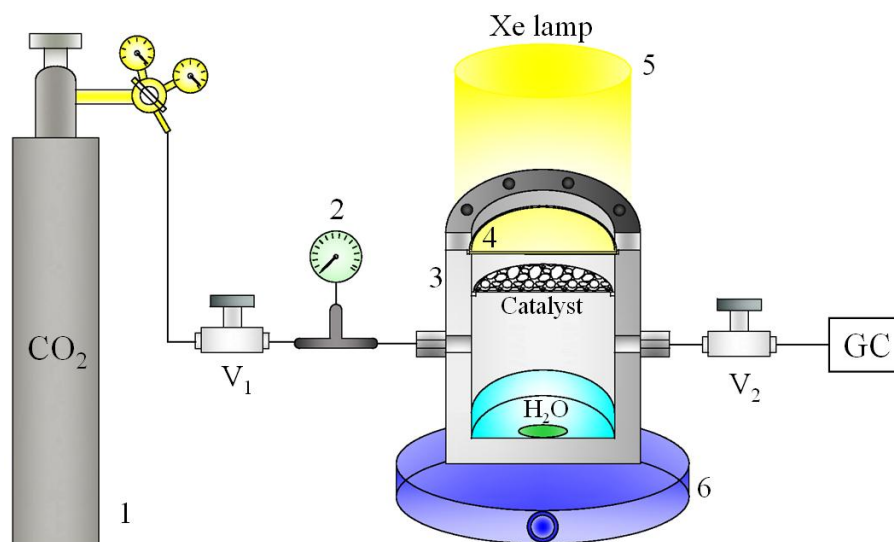

**Fig. S1** Reactor used for photocatalytic reduction of CO<sub>2</sub> in the presence of H<sub>2</sub>O.

1: CO<sub>2</sub> gas cylinder, 2: pressure digital meter, 3: stainless steel reactor, 4: O-ring quartz window, 5: Xe lamp, 6: magnetic stirrer, V<sub>1</sub> and V<sub>2</sub>: valves.

To measure the amount of O<sub>2</sub> formed during the photocatalytic reaction, we also analyzed the products by using an Agilent Micro GC 3000 equipped with a 5A column and a TCD detector. We performed a 30 h photocatalytic reaction for the 0.5% Pt–1% MgO/TiO<sub>2</sub> catalyst under the reaction conditions described above. The amounts of O<sub>2</sub> and CH<sub>4</sub> detected were 13.6 μmol and 5.5 μmol. The molar ratio of O<sub>2</sub>/CH<sub>4</sub> was approximately 2.5/1, slightly higher than the stoichiometric ratio (2/1) expected from the photocatalytic conversion of CO<sub>2</sub> with H<sub>2</sub>O to CH<sub>4</sub> and O<sub>2</sub>. We speculate that the slightly higher ratio of O<sub>2</sub>/CH<sub>4</sub> may be due to the formation of other reduction products such as CO.

## 2. Comparison of CH<sub>4</sub> formations in the photocatalytic reactions in the presence and the absence of CO<sub>2</sub> over 0.5% Pt/TiO<sub>2</sub> and 0.5%–1% MgO/TiO<sub>2</sub> catalysts

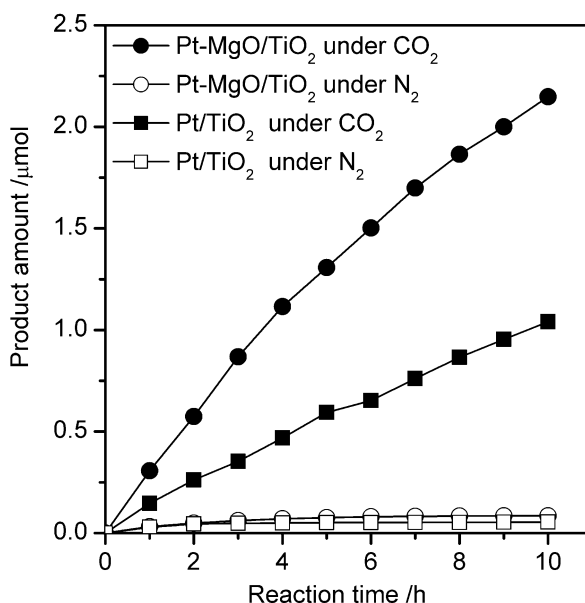

**Fig. S2** Amounts of CH<sub>4</sub> formed in photocatalytic reactions in the presence of H<sub>2</sub>O under CO<sub>2</sub> or N<sub>2</sub>. Reaction conditions: catalyst, 0.020 g; CO<sub>2</sub> or N<sub>2</sub> pressure, 2 MPa; H<sub>2</sub>O, 1.0 mL; irradiation time, 10 h.

## 3. Effect of basic metal oxide modifiers on photocatalytic performances of the 0.5 wt% Pt/TiO<sub>2</sub> catalysts

Table S1 shows the photocatalytic performances of the 0.5 wt% Pt/TiO<sub>2</sub> catalysts modified with various basic metal oxides for the reduction of CO<sub>2</sub> in the presence of H<sub>2</sub>O.

**Table S1** Effect of basic metal oxide modifiers on photocatalytic performances of the Pt/TiO<sub>2</sub> for the reduction of CO<sub>2</sub> with H<sub>2</sub>O.<sup>a</sup>

| Photocatalyst <sup>b</sup>                                  | $S_{\text{BET}}^c$<br>(m <sup>2</sup> g <sup>-1</sup> ) | Mean size of<br>Pt (nm) | Chemisorbed<br>CO <sub>2</sub><br>(μmol g <sup>-1</sup> ) | Product amount<br>(μmol) |                 |
|-------------------------------------------------------------|---------------------------------------------------------|-------------------------|-----------------------------------------------------------|--------------------------|-----------------|
|                                                             |                                                         |                         |                                                           | CO                       | CH <sub>4</sub> |
| 0.5% Pt/TiO <sub>2</sub>                                    | 55                                                      | 4.2                     | 5.0                                                       | 0.22                     | 1.0             |
| 0.5% Pt-1% Al <sub>2</sub> O <sub>3</sub> /TiO <sub>2</sub> | 51                                                      | 4.0                     | 4.9                                                       | 0.15                     | 0.90            |
| 0.5% Pt-1% CuO/TiO <sub>2</sub>                             | 50                                                      | 3.9                     | 5.6                                                       | 0.15                     | 1.2             |
| 0.5% Pt-1% ZnO/TiO <sub>2</sub>                             | 44                                                      | 3.8                     | 5.8                                                       | 0.12                     | 1.2             |
| 0.5% Pt-1% La <sub>2</sub> O <sub>3</sub> /TiO <sub>2</sub> | 50                                                      | 4.0                     | 6.6                                                       | 0.014                    | 1.4             |
| 0.5% Pt-1% Lu <sub>2</sub> O <sub>3</sub> /TiO <sub>2</sub> | 46                                                      | 3.9                     | 8.8                                                       | 0.006                    | 1.7             |
| 0.5% Pt-1% MgO/TiO <sub>2</sub>                             | 43                                                      | 4.0                     | 11.5                                                      | 0.006                    | 2.2             |
| 0.5% Pt-1% CaO/TiO <sub>2</sub>                             | 43                                                      | 4.0                     | 8.7                                                       | 0.006                    | 1.5             |
| 0.5% Pt-1% SrO/TiO <sub>2</sub>                             | 44                                                      | 4.1                     | 10.6                                                      | 0.010                    | 1.9             |
| 0.5% Pt-1% BaO/TiO <sub>2</sub>                             | 47                                                      | 4.0                     | 8.3                                                       | 0.008                    | 1.5             |

<sup>a</sup> Reaction conditions: catalyst, 0.020 g; CO<sub>2</sub> pressure, 2 MPa; H<sub>2</sub>O, 1.0 mL; irradiation time, 10 h.

<sup>b</sup> The percentage before each component denotes its weight percentage. <sup>c</sup> BET surface area.

## References

- 1 K. Teramura, S. Okuoka, H. Tsuneoka, T. Shishido and T. Tanaka, *Appl. Catal. B*, 2010, **96**, 565-568.
